# Supplementary material for: Value of Cardiac Biomarkers in the Early Diagnosis of Takotsubo Syndrome
Source: PubMed Central journal article supplement (PMC7564647; doi:10.3390/jcm9092985), 2020-09-15
Supplement: jcm-09-02985-s001.pdf [file jcm-09-02985-s001.pdf]

SUPPLEMENTARY FILES

Table S1. Cardiac biomarkers .

|                             | TTS<br>patients<br>(n = 314) | STEMI<br>patients<br>(n = 452) | NSTEMI<br>patients<br>(n = 334) | p value | p value<br>STEMI vs<br>TTS | p value<br>NSTEMI<br>I vs TTS | p value<br>STEMI vs<br>NSTEMI |
|-----------------------------|------------------------------|--------------------------------|---------------------------------|---------|----------------------------|-------------------------------|-------------------------------|
| <b>Biology at admission</b> |                              |                                |                                 |         |                            |                               |                               |
| Tn I, ng/L                  | 1 [2.7]                      | 1.3 [12]                       | 0.4 [1.5]                       | <0.001  | <0.001                     | 1                             | <0.001                        |
| BNP, ng/mL                  | 427.5 [967.2]                | 70 [183.2]                     | 99.5 [199.5]                    | <0.001  | <0.001                     | <0.001                        | 0.445                         |
| BNP/Tn                      | 468.2 [1435.5]               | 26.5 [145.8]                   | 144 [811.0]                     | <0.001  | <0.001                     | <0.001                        | 0.082                         |
| <b>Biology at peak</b>      |                              |                                |                                 |         |                            |                               |                               |
| Tn I, ng/L                  | 2.2 [4.9]                    | 64.3 [138.6]                   | 3.3 [12.1]                      | <0.001  | <0.001                     | 1                             | <0.001                        |
| Day of peak Tn              | 0 [1]                        | 1 [1]                          | 1 [1]                           | <0.001  | 0.484                      | 0.004                         | <0.001                        |
| BNP, ng/mL                  | 666.0 [1203.2]               | 91 [257]                       | 111 [216.2]                     | <0.001  | <0.001                     | <0.001                        | 1                             |
| Day of peak BNP             | 0 [2]                        | 0 [0]                          | 0 [0]                           | 0.014   | 0.100                      | 0.012                         | 0.543                         |
| Peak BNP/peak Tn            | 228.3 [700.1]                | 1.2 [4.8]                      | 21.4 [107.4]                    | <0.001  | <0.001                     | <0.001                        | 0.669                         |
| <b>Biology at discharge</b> |                              |                                |                                 |         |                            |                               |                               |
| Troponin I, ng/L            | 0.4 [1.2]                    | 14.3 [30.8]                    | 1.8 [5.1]                       | <0.001  | <0.001                     | 0.302                         | <0.001                        |
| BNP, ng/mL                  | 323 [501.0]                  | 89 [233]                       | 102 [187]                       | <0.001  | <0.001                     | <0.001                        | 1                             |

Data presented were number (percentage); quantitative variables as median [interquartile interval] or mean  $\pm$  95% confidence interval. BNP, brain natriuretic peptide; NSTEMI, non ST segment elevation myocardial infarction; STEMI, ST segment elevation myocardial infarction; TTS, Takotsubo syndrome; Tn I, Troponin I.

**Table S2.** Baseline characteristics of Takotsubo and ACS patients after propensity score.

|                                                        | TTS<br>patients<br>( <i>n</i> = 152) | STEMI<br>patients<br>( <i>n</i> = 385) | NSTEMI<br>patients<br>( <i>n</i> = 245) | <i>p</i> value |
|--------------------------------------------------------|--------------------------------------|----------------------------------------|-----------------------------------------|----------------|
| <b>Demographics</b>                                    |                                      |                                        |                                         |                |
| Age                                                    | 68.8 ± 13.6                          | 62.8 ± 13.8                            | 67 ± 13.7                               | <0.001         |
| Female gender, <i>n</i> (%)                            | 123 (80.9)                           | 89 (23.1)                              | 58 (23.7)                               | <0.001         |
| Weight                                                 | 66.4 ± 15.1                          | 78.7 ± 16.3                            | 81.2 ± 15.8                             | <0.001         |
| <b>CVD risk factors</b>                                |                                      |                                        |                                         |                |
| Hypertension, <i>n</i> (%)                             | 83 (54.6)                            | 197 (51.2)                             | 170 (69.4)                              | <0.001         |
| Diabetes mellitus, <i>n</i> (%)                        | 25 (16.4)                            | 77 (20)                                | 72 (29.4)                               | 0.0035         |
| Dyslipidemia, <i>n</i> (%)                             | 53 (34.9)                            | 156 (40.5)                             | 140 (57.1)                              | <0.001         |
| Current tobacco use, <i>n</i> (%)                      | 33 (21.7)                            | 176 (45.7)                             | 76 (31.0)                               | <0.001         |
| Past tobacco use, <i>n</i> (%)                         | 32 (21.1)                            | 101 (26.2)                             | 76 (31.0)                               | 0.088          |
| <b>Background</b>                                      |                                      |                                        |                                         |                |
| History of malignancy, <i>n</i> (%)                    | 38 (25)                              | 24 (6.2)                               | 15 (6.1)                                | <0.001         |
| History of psychiatric disease, <i>n</i> (%)           | 44 (29.1)                            | 9 (2.3)                                | 2 (0.8)                                 | <0.001         |
| History of AF, <i>n</i> (%)                            | 15 (9.9)                             | 19 (5.0)                               | 25 (10.2)                               | 0.025          |
| History of stroke, <i>n</i> (%)                        | 10 (6.6)                             | 23 (6.0)                               | 30 (12.2)                               | 0.014          |
| History of PAD or ischemic heart disease, <i>n</i> (%) | 29 (19.2)                            | 66 (17.1)                              | 75 (30.6)                               | <0.001         |
| Chronic kidney disease, <i>n</i> (%)                   |                                      |                                        |                                         |                |
| moderate (DFG 30–60)                                   | 30 (19.7)                            | 40 (10.4)                              | 29 (11.8)                               | -              |
| severe (15–30)                                         | 3 (2.0)                              | 10 (2.6)                               | 6 (2.4)                                 |                |
| terminal (<15)                                         | 1 (0.7)                              | 2 (0.5)                                | 1 (0.4)                                 |                |
| <b>Electrocardiogram at admission</b>                  |                                      |                                        |                                         |                |
| Q wave, <i>n</i> (%)                                   | 83 (55.3)                            | 85 (47.5)                              | 4 (1.7)                                 | <0.001         |
| <b>Echocardiography</b>                                |                                      |                                        |                                         |                |
| LVEF at admission, %                                   | 39.2 ± 11.9                          | 50.5 ± 11.2                            | 54.5 ± 10.7                             | <0.001         |
| RV involvement, <i>n</i> (%)                           | 4 (2.9)                              | 38 (9.9)                               | 7 (2.9)                                 | <0.001         |
| <b>Biology at admission</b>                            |                                      |                                        |                                         |                |
| CRP, mg/L                                              | 7.1 [33.1]                           | 3.0 [8.6]                              | 3.0 [6.9]                               | <0.001         |
| Leukocytes, G/L                                        | 12.6 ± 5.9                           | 11.9 ± 3.9                             | 10.0 ± 5.1                              | <0.001         |
| Hemoglobin, g/dL                                       | 13.3 ± 2.0                           | 14.2 ± 1.7                             | 13.9 ± 1.8                              | <0.001         |
| Creatinine serum μmol/L                                | 66.0 [30.4]                          | 74.0 [25.6]                            | 75.0 [26.2]                             | 0.0417         |
| GFR, mL/min/m <sup>2</sup>                             | 77.7 ± 29.6                          | 81.1 ± 17.2                            | 79.3 ± 17.6                             | 0.175          |
| Plasma sodium level, mmol/L                            | 137.7 ± 4.8                          | 137.5 ± 3.1                            | 138.3 ± 2.9                             | 0.00657        |
| Plasma potassium level, mmol/L                         | 4.0 ± 0.5                            | 4.0 ± 0.5                              | 4.0 ± 0.5                               | 0.354          |

Data presented were number (percentage); quantitative variables as median [interquartile interval] or mean ± 95% confidence interval. AF, atrial fibrillation; CKD-EPI, Chronic Kidney Disease Epidemiology Collaboration; CRP, C-reactive protein; CVD, cardiovascular disease; DBP, diastolic blood pressure; GFR, glomerular filtration rate; LVEF, left ventricular ejection fraction; NSTEMI, non ST segment elevation myocardial infarction; PAD, peripheral artery disease; RV, right ventricle; SBP, systolic blood pressure; STEMI, ST segment elevation myocardial infarction; TTS, Takotsubo syndrome.

**Table S3.** In hospital outcome and follow up after propensity score.

|                                                 | <b>TTS patients<br/>(n = 152)</b> | <b>STEMI patients<br/>(n = 385)</b> | <b>NSTEMI<br/>patients<br/>(n = 245)</b> | <b>p value</b> |
|-------------------------------------------------|-----------------------------------|-------------------------------------|------------------------------------------|----------------|
| <b>In-hospital events</b>                       |                                   |                                     |                                          |                |
| Cardiogenic shock, <i>n</i> (%)                 | 24 (15.8)                         | 11 (2.9)                            | 0 (0)                                    | <0.001         |
| SVT, <i>n</i> (%)                               | 34 (22.4)                         | 11 (2.9)                            | 7 (2.9)                                  | <0.001         |
| Sustained VT, <i>n</i> (%)                      | 2 (1.3)                           | 1 (0.3)                             | 1 (0.4)                                  | 0.2918         |
| 3-degree AV block, <i>n</i> (%)                 | 1 (0.7)                           | 7 (1.8)                             | 0 (0)                                    | 0.07667        |
| In hospital mortality, <i>n</i> (%)             | 12 (7.9)                          | 9 (2.3)                             | 5 (2.0)                                  | 0.002173       |
| <b>Hospital length of stay, <i>n</i> (days)</b> | <b>7.0 [6.0]</b>                  | <b>5.0 [5.0]</b>                    | <b>4.0 [4.0]</b>                         | <b>0.607</b>   |
| <b>Follow up events</b>                         |                                   |                                     |                                          |                |
| Hospitalization for acute HF, <i>n</i> (%)      | 10 (6.8)                          | 22 (6.0)                            | 6 (2.6)                                  | 0.1036         |
| 30-day mortality, <i>n</i> (%)                  | 10 (6.9)                          | 12 (3.1)                            | 7 (2.9)                                  | 0.08561        |
| 1-year mortality, <i>n</i> (%)                  | 20 (15.5)                         | 19 (5.0)                            | 16 (6.6)                                 | <0.001         |
| 1-year CV mortality, <i>n</i> (%)               | 7 (4.9)                           | 11 (2.9)                            | 7 (2.9)                                  | 0.4627         |

Data presented were number (percentage); quantitative variables as median [interquartile interval] or mean  $\pm$  95% confidence interval; AV, atrio-ventricular; CV, Cardiovascular; HF, heart failure; NSTEMI, non ST segment elevation myocardial infarction; STEMI, ST segment elevation myocardial infarction; SVT, supraventricular tachycardia; TTS, Takotsubo syndrome; VF, ventricular fibrillation; VT, ventricular tachycardia.

**Table S4.** Cardiac biomarkers after propensity score.

|                             | <b>TTS<br/>patients<br/>(n = 152)</b> | <b>STEMI<br/>patients<br/>(n = 385)</b> | <b>NSTEMI<br/>patients<br/>(n = 245)</b> | <b>p value</b> |
|-----------------------------|---------------------------------------|-----------------------------------------|------------------------------------------|----------------|
| <b>Biology at admission</b> |                                       |                                         |                                          |                |
| TnI, ng/L                   | 1.7 [3.8]                             | 1.3 [9.9]                               | 0.5 [1.8]                                | <0.001         |
| BNP, ng/mL                  | 188.0 [432.2]                         | 74.0 [183]                              | 88.0 [152.0]                             | <0.001         |
| BNP/TnI                     | 136.9 [421.2]                         | 30.0 [144.0]                            | 106.0 [298.0]                            | 0.0398         |
| <b>Biology at peak</b>      |                                       |                                         |                                          |                |
| TnI, ng/L                   | 4.4 [7.7]                             | 64.2 [129.2]                            | 5.1 [15.4]                               | <0.001         |
| Day of peak TnI             | 0 [1.0]                               | 1.0 [1.0]                               | 1.0 [1.0]                                | <0.001         |
| BNP, ng/mL                  | 411.5 [785.8]                         | 91.0 [236.0]                            | 90.0 [180.0]                             | <0.001         |
| Day of peak BNP             | 1.0 [2.0]                             | 0.0 [0.0]                               | 0.0 [0.0]                                | 0.00516        |
| Peak BNP/peak TnI           | 101.0 [152.3]                         | 1.6 [5.4]                               | 18.1 [59.9]                              | <0.001         |
| <b>Biology at discharge</b> |                                       |                                         |                                          |                |
| TnI, ng/L                   | 0.6 [1.8]                             | 14.3 [30.5]                             | 2.8 [6.7]                                | <0.001         |
| BNP, ng/mL                  | 252.0 [476.5]                         | 90.0 [224.2]                            | 88.0 [162.0]                             | <0.001         |

Data presented were number (percentage); quantitative variables as median [interquartile interval] or mean  $\pm$  95% confidence interval. BNP, brain natriuretic peptide; STEMI, ST segment elevation myocardial infarction; TTS, Takotsubo syndrome; Tn I, Troponin I.

**Table S5.** Univariate and multivariate analyses to identify independent predictors of 30-day- mortality.

|                                          | Univariate Analysis |                | Multivariate Analysis |                |
|------------------------------------------|---------------------|----------------|-----------------------|----------------|
|                                          | OR (95% CI)         | <i>p</i> value | OR (95% CI)           | <i>p</i> value |
| <b>Patient characteristics</b>           |                     |                |                       |                |
| Age, years                               | 1.03 (1.00–1.07)    | 0.10           |                       |                |
| Female gender                            | 0.64 (0.22–1.85)    | 0.41           |                       |                |
| Hypertension                             | 0.75 (0.30–1.86)    | 0.53           |                       |                |
| Diabetes mellitus                        | 1.32 (0.46–3.79)    | 0.60           |                       |                |
| Dyslipidemia                             | 0.25 (0.07–0.86)    | 0.03           | 0.10 (0.01–0.84)      | 0.03           |
| Current tobacco use                      | 1.45 (0.50–4.17)    | 0.49           |                       |                |
| Past tobacco use                         | 0.63 (0.18–2.21)    | 0.47           |                       |                |
| History of malignancy                    | 2.43 (0.97–6.11)    | 0.06           |                       |                |
| History of psychiatric disease           | 0.54 (0.17–1.65)    | 0.28           |                       |                |
| History of AF                            | 0.99 (0.28–3.53)    | 0.99           |                       |                |
| History of PAD or ischemic heart disease | 2.37 (0.93–6.06)    | 0.07           |                       |                |
| Heart rate, bpm                          | 1.02 (1.00–1.04)    | 0.06           |                       |                |
| SBP, mmHg                                | 0.92 (0.88–0.97)    | <0.001         | 0.92 (0.88–0.96)      | <0.001         |
| LVEF on admission, %                     | 0.98 (0.95–1.02)    | 0.43           |                       |                |
| RV involvement                           | 1.18 (0.15–9.59)    | 0.88           |                       |                |
| <b>Biology on admission</b>              |                     |                |                       |                |
| Troponin I, ng/L                         | 0.99 (0.91–1.08)    | 0.88           |                       |                |
| BNP, ng/L                                | 1.00 (1.00–1.00)    | 0.19           |                       |                |
| CRP, mg/L                                | 1.01 (1.00–1.01)    | 0.03           | –*                    | –*             |
| Leukocytes, G/L                          | 1.05 (0.98–1.12)    | 0.16           |                       |                |
| Hemoglobin, g/dl                         | 0.79 (0.63–0.99)    | 0.04           | –*                    | –*             |
| Creatinine serum, μmol/L                 | 1.00 (1.00–1.00)    | 0.43           |                       |                |
| eGFR, mL/min/1.73 m <sup>2</sup>         | 1.00 (0.98–1.02)    | 0.86           |                       |                |
| Plasma sodium level, mmol/L              | 0.92 (0.84–1.01)    | 0.07           |                       |                |

\* excluded according to removal criteria. AF, atrial fibrillation; BNP, Brain Natriuretic Peptide; CRP, C-reactive protein; GFR, glomerular filtration rate; LVEF, left ventricular ejection fraction; PAD, peripheral artery disease; RV, right ventricle; SBP, systolic blood pressure.

**Table S6.** Univariate and multivariate analyses to identify independent predictors of 1-year – mortality.

|                                          | Univariate Analysis |                | Multivariate Analysis |                |
|------------------------------------------|---------------------|----------------|-----------------------|----------------|
|                                          | OR (95% CI)         | <i>p</i> value | OR (95% CI)           | <i>p</i> value |
| <b>Patient characteristics</b>           |                     |                |                       |                |
| Age, years                               | 1.01 (0.99–1.04)    | 0.21           |                       |                |
| Female gender                            | 0.64 (0.30–1.38)    | 0.25           |                       |                |
| Hypertension                             | 0.85 (0.44–1.65)    | 0.64           |                       |                |
| Diabetes mellitus                        | 1.61 (0.76–3.39)    | 0.22           |                       |                |
| Dyslipidemia                             | 0.27 (0.12–0.62)    | 0.002          | 0.18 (0.07–0.47)      | <0.001         |
| Current tobacco use                      | 1.01 (0.43–2.34)    | 0.99           |                       |                |
| Past tobacco use                         | 1.30 (0.61–2.79)    | 0.49           |                       |                |
| History of malignancy                    | 3.66 (1.85–7.22)    | <0.001         | _*                    | _*             |
| History of psychiatric disease           | 0.83 (0.40–1.71)    | 0.61           |                       |                |
| History of AF                            | 0.68 (0.25–1.87)    | 0.46           |                       |                |
| History of PAD or ischemic heart disease | 1.55 (0.76–3.17)    | 0.22           |                       |                |
| Heart rate, bpm                          | 1.02 (1.01–1.04)    | 0.002          | 1.02 (1.00–1.03)      | 0.04           |
| SBP, mmHg                                | 0.95 (0.92–0.98)    | 0.003          | _*                    | _*             |
| LVEF on admission, %                     | 0.95 (0.93–0.98)    | 0.004          | 0.95 (0.92–0.98)      | 0.004          |
| RV involvement                           | 6.50 (1.97–21.48)   | 0.002          | _*                    | _*             |
| <b>Biology on admission</b>              |                     |                |                       |                |
| Troponin I, ng/L                         | 1.01 (0.97–1.06)    | 0.56           |                       |                |
| BNP, ng/L                                | 1.00 (1.00–1.00)    | 0.008          | _*                    | _*             |
| CRP, mg/L                                | 1.01 (1.00–1.01)    | <0.001         | _*                    | _*             |
| Leukocytes, G/L                          | 1.06 (1.01–1.11)    | 0.02           | _*                    | _*             |
| Hemoglobin, g/dl                         | 0.73 (0.62–0.87)    | <0.001         | 0.76 (0.63–0.93)      | 0.006          |
| Creatinine serum, μmol/L                 | 1.00 (1.00–1.01)    | 0.25           |                       |                |
| eGFR, mL/min/1.73 m <sup>2</sup>         | 0.99 (0.97–1.00)    | 0.047          | _*                    | _*             |
| Plasma sodium level, mmol/L              | 0.90 (0.84–0.97)    | 0.004          | _*                    | _*             |

\* excluded according to removal criteria. AF, atrial fibrillation; BNP, Brain Natriuretic Peptide; CRP, C-reactive protein; GFR, glomerular filtration rate; LVEF, left ventricular ejection fraction; PAD, peripheral artery disease; RV, right ventricle; SBP, systolic blood pressure.

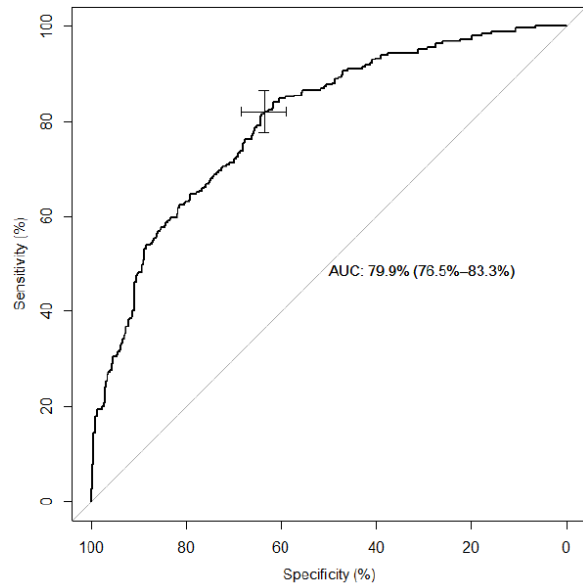

STEMI 68.25 TAKO TSUBO

**Figure a.** TTS *vs* STEMI, ROC curve for BNP/TnI at admission (supplementary files)

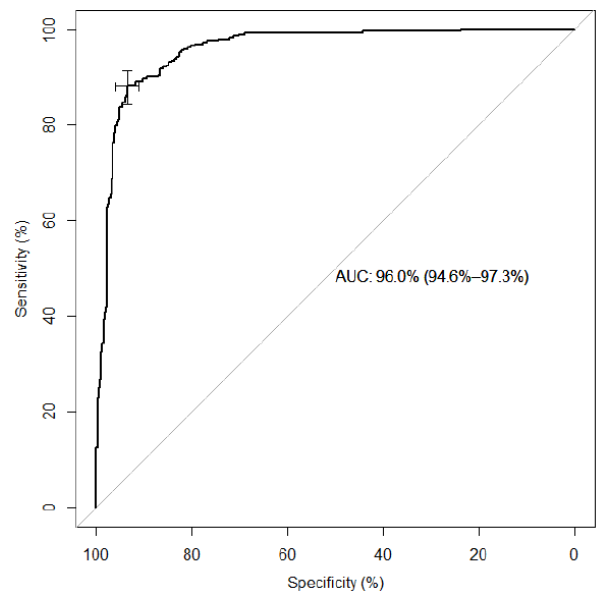

STEMI 39.25 TAKO TSUBO

**Figure b.** TTS *vs* STEMI, ROC curve for BNP/TnI at peak (supplementary files)

**Figure S1.** TTS *vs* STEMI: ROC curves for BNP/TnI at admission (Figure a) and at peak (Figure b); BNP, B-natriuretic peptide; STEMI, ST segment elevation myocardial infarction; Tn, Troponin; TTS, Takotsubo syndrome

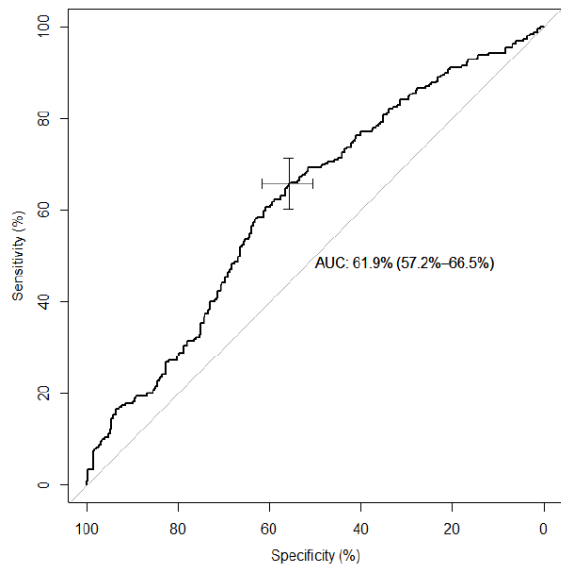

NSTEMI 196.25 TAKO TSUBO

**Figure a.** TTS vs NSTEMI, ROC curve for BNP/TnI at admission (supplementary files)

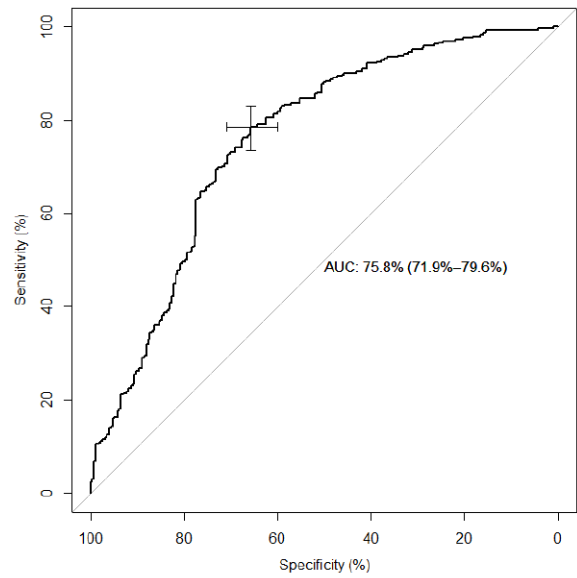

NSTEMI 76.50 TAKO TSUBO

**Figure b.** TTS vs NSTEMI, ROC curve for BNP/TnI at peak (supplementary files)

**Figure S2.** TTS vs NSTEMI: ROC curves for BNP/TnI at admission (Figure a) and at peak (Figure b); BNP, B-natriuretic peptide; NSTEMI, non ST segment elevation infarction; Tn, Troponin; TTS, Takotsubo syndrome.

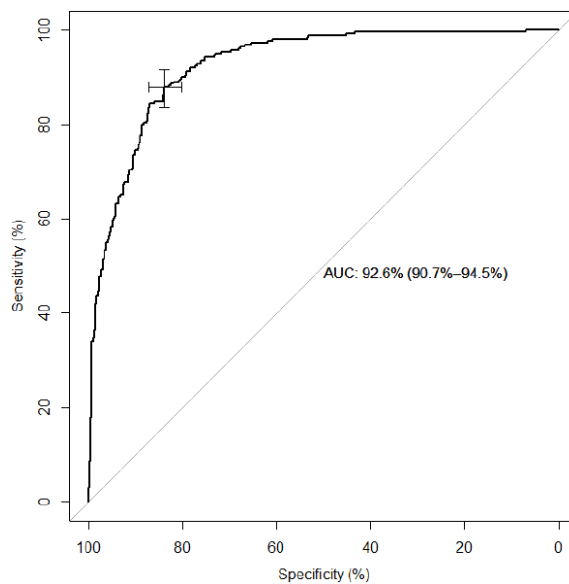

STEMI 0.3851 TAKO TSUBO

**Figure S3.** TTS vs STEMI, ROC curve for the complex score; STEMI, ST segment elevation myocardial infarction; TTS, Takotsubo syndrome

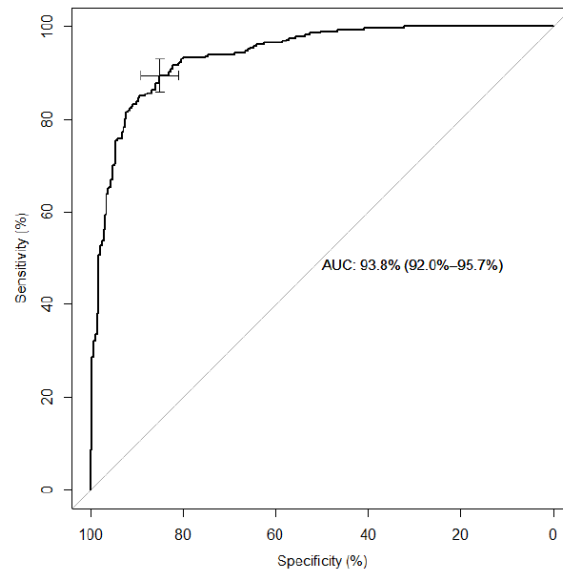

---

NSTEMI 0.4406 TAKO TSUBO

**Figure S4.** TTS *vs* NSTEMI, ROC curve for the complex score; NSTEMI, non ST segment elevation infarction; TTS, Takotsubo syndrome.



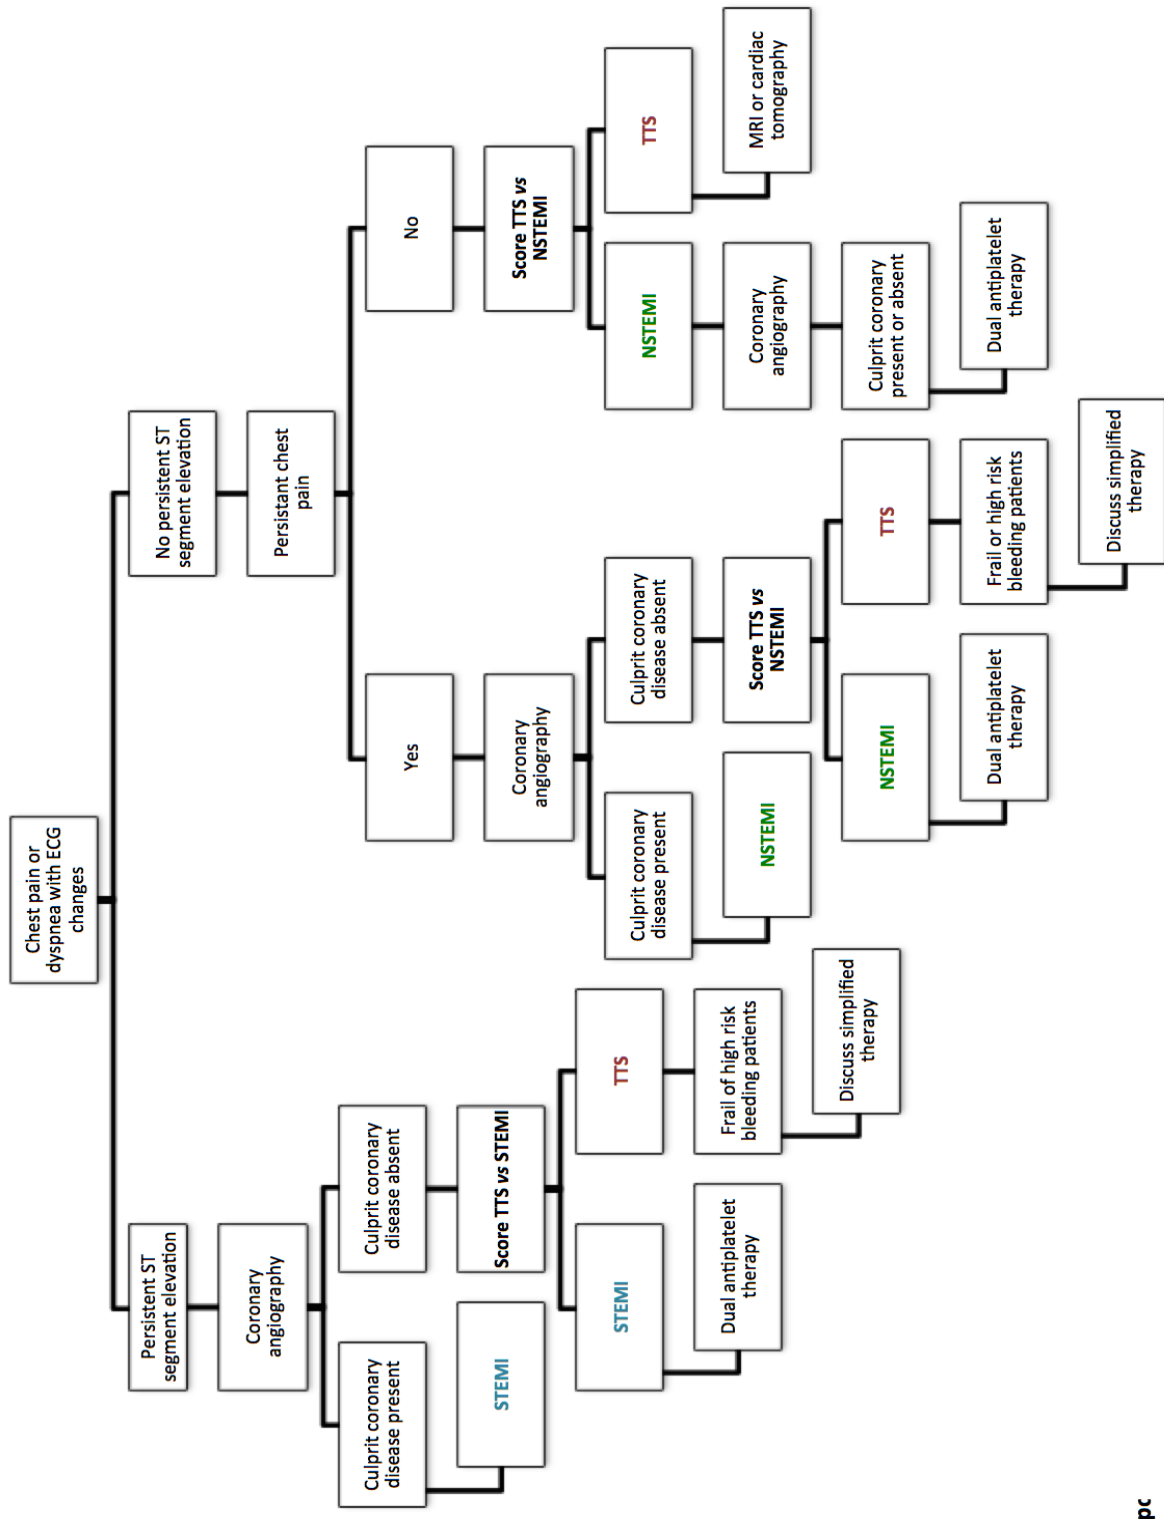

pc

**Figure S5.** Proposed new diagnostic algorithm to discriminate TTS from ACS; NSTEMI, non ST segment elevation infarction; STEMI, ST segment elevation myocardial infarction; TTS, Takotsubo syndrome.
